# Supplementary material
Source: HighWire-hosted journal article supplement (https://qualitysafety.bmj.com/highwire/filestream/164804/field_highwire_adjunct_files/2/bmjqs-2024-017296supp003_data_supplement.pdf)
Supplement: bmjqs-2024-017296supp003_data_supplement.pdf [file bmjqs-2024-017296supp003_data_supplement.pdf]

**Supplemental File – Antibiotics**

All oral formulation prescription antibiotics, available in BC were included: amoxicillin, cefalexin, nitrofurantoin, amoxicillin and beta-lactamase inhibitor, doxycycline, azithromycin, ciprofloxacin, sulfamethoxazole and trimethoprim, clindamycin, clarithromycin, cefixime, phenoxymethylpenicillin, fosfomycin, moxifloxacin, minocycline, cefuroxime, tetracycline, cloxacillin, erythromycin, cefadroxil, levofloxacin, trimethoprim, ampicillin, cefprozil, linezolid, norfloxacin, metronidazole, spiramycin, vancomycin, benzathine phenoxymethylpenicillin, fusidic acid, and methenamine.
